# Supplementary material for: Intradetrusor OnabotulinumtoxinA Injections Ameliorate Autonomic Dysreflexia while Improving Lower Urinary Tract Function and Urinary Incontinence-Related Quality of Life in Individuals with Cervical and Upper Thoracic Spinal Cord Injury
Source: PubMed Central journal article supplement (PMC7470218; doi:10.1089/neu.2020.7115), 2020-08-27
Supplement: Supp_Fig1.pdf [file Supp_Fig1.pdf]

## Supplementary Data

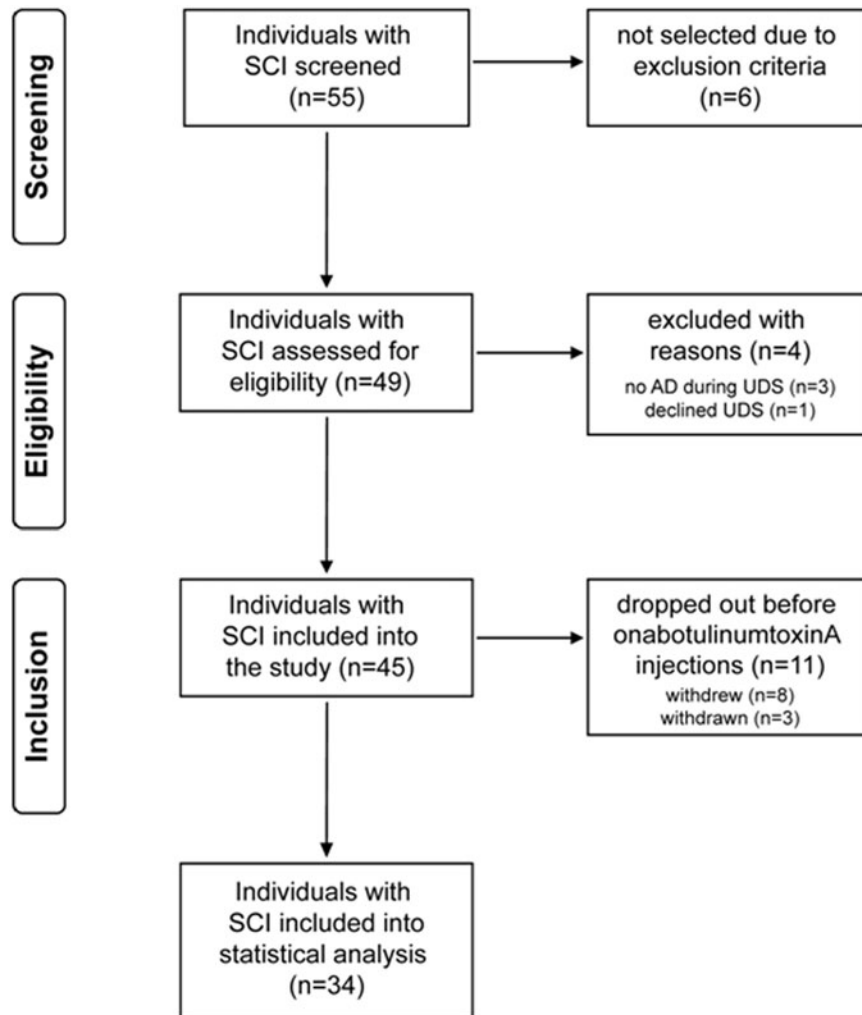

SUPPLEMENTARY FIG. S1. Study flow diagram.
