# Supplementary material for: Intradetrusor OnabotulinumtoxinA Injections Ameliorate Autonomic Dysreflexia while Improving Lower Urinary Tract Function and Urinary Incontinence-Related Quality of Life in Individuals with Cervical and Upper Thoracic Spinal Cord Injury
Source: PubMed Central journal article supplement (PMC7470218; doi:10.1089/neu.2020.7115), 2020-08-27
Supplement: Supp_Fig2.pdf [file Supp_Fig2.pdf]

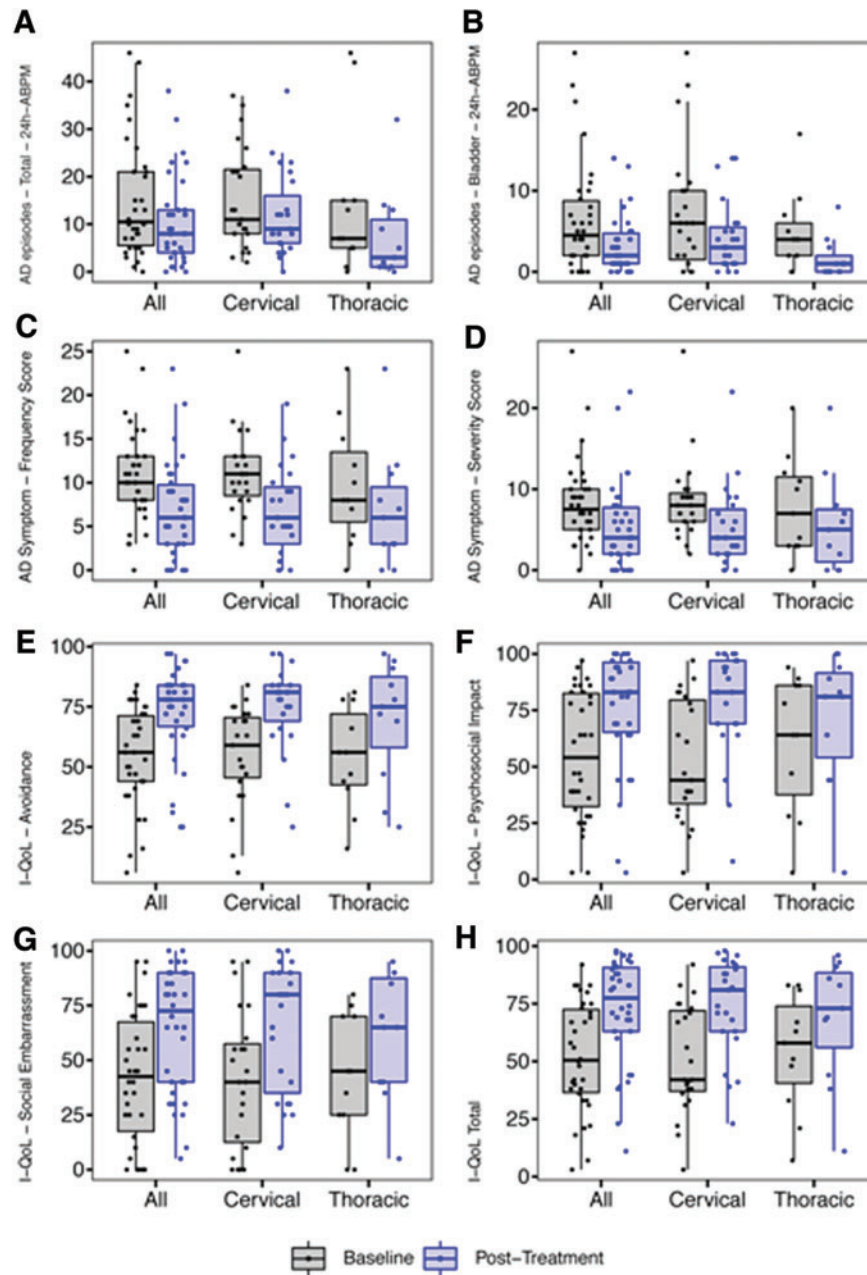

**SUPPLEMENTARY FIG. S2.** (A) Frequency of total autonomic dysreflexia (AD) episodes in daily life. (B) Frequency of bladder-related AD episodes in daily life. (C) AD symptoms frequency score. (D) AD symptoms severity score. Urinary incontinence-related quality of life (I-QoL)—subsections (E) avoidance and limiting behavior, (F) psychosocial Impact, (G) social embarrassment, and (H) in total. Data are presented at group level using box plots (median, interquartile range) and individually (dots).
