# Supplementary material for: Intradetrusor OnabotulinumtoxinA Injections Ameliorate Autonomic Dysreflexia while Improving Lower Urinary Tract Function and Urinary Incontinence-Related Quality of Life in Individuals with Cervical and Upper Thoracic Spinal Cord Injury
Source: PubMed Central journal article supplement (PMC7470218; doi:10.1089/neu.2020.7115), 2020-08-27
Supplement: Supp_Table1.pdf [file Supp_Table1.pdf]

SUPPLEMENTARY TABLE S1. DEMOGRAPHICS AND INJURY CHARACTERISTICS

| <i>No.</i> | <i>NLI</i> | <i>AIS</i> | <i>Sex</i> | <i>Age (years)</i> | <i>Time post-injury (years)</i> | <i>Cause of spinal cord injury</i> | <i>Bladder management</i> | <i>History of onabotulinum-toxinA injections</i> |
|------------|------------|------------|------------|--------------------|---------------------------------|------------------------------------|---------------------------|--------------------------------------------------|
| 1          | C1         | C          | M          | 43                 | 27                              | MVA                                | IC                        | Naive                                            |
| 2          | C4         | A          | F          | 35                 | 13                              | Other                              | IC                        | Naive                                            |
| 3          | C4         | A          | F          | 51                 | 6                               | MVA                                | IC                        | Naive                                            |
| 4          | C4         | B          | M          | 22                 | 5                               | Other                              | IC                        | Naive                                            |
| 5          | C4         | D          | M          | 46                 | 1                               | MVA                                | Foley*                    | Naive                                            |
| 6          | C5         | A          | M          | 47                 | 6                               | Other                              | IC                        | Naive                                            |
| 7          | C5         | A          | M          | 36                 | 1                               | Sports                             | IC                        | Naive                                            |
| 8          | C5         | B          | M          | 31                 | 2                               | Fall                               | IC                        | Naive                                            |
| 9          | C5         | B          | M          | 31                 | 2                               | Sports                             | IC                        | Yes (Once)                                       |
| 10         | C5         | B          | M          | 46                 | 30                              | Sports                             | Foley*                    | Naive                                            |
| 11         | C5         | C          | M          | 43                 | 23                              | Sports                             | IC                        | Naive                                            |
| 12         | C5         | C          | M          | 62                 | 4                               | Fall                               | IC                        | Naive                                            |
| 13         | C6         | A          | M          | 44                 | 19                              | Sports                             | IC                        | Naive                                            |
| 14         | C6         | A          | M          | 59                 | 32                              | MVA                                | IC                        | Naive                                            |
| 15         | C6         | A          | F          | 43                 | 14                              | MVA                                | IC                        | Naive                                            |
| 16         | C6         | B          | F          | 55                 | 20                              | Fall                               | IC                        | Naive                                            |
| 17         | C6         | B          | F          | 34                 | 15                              | MVA                                | Foley*                    | Naive                                            |
| 18         | C7         | A          | F          | 42                 | 18                              | MVA                                | IC                        | Naive                                            |
| 19         | C7         | B          | M          | 26                 | 7                               | MVA                                | IC                        | Naive                                            |
| 20         | C7         | B          | M          | 36                 | 4                               | Other                              | IC                        | Naive                                            |
| 21         | C7         | B          | M          | 49                 | 6                               | Sports                             | IC                        | Naive                                            |
| 22         | C8         | A          | M          | 42                 | 22                              | MVA                                | IC                        | Naive                                            |
| 23         | C8         | B          | M          | 45                 | 40                              | MVA                                | IC                        | Naive                                            |
| 24         | T2         | A          | M          | 36                 | 8                               | MVA                                | IC                        | Yes (Thrice)                                     |
| 25         | T3         | B          | M          | 38                 | 20                              | MVA                                | IC                        | Yes (Once)                                       |
| 26         | T3         | A          | M          | 53                 | 40                              | Other                              | IC                        | Naive                                            |
| 27         | T4         | A          | M          | 30                 | 10                              | Sports                             | IC                        | Naive                                            |
| 28         | T4         | A          | F          | 36                 | 21                              | Sports                             | IC                        | Naive                                            |
| 29         | T4         | A          | M          | 22                 | 5                               | MVA                                | IC                        | Naive                                            |
| 30         | T4         | A          | M          | 56                 | 2                               | MVA                                | IC                        | Naive                                            |
| 31         | T5         | A          | M          | 62                 | 42                              | MVA                                | IC                        | Naive                                            |
| 32         | T5         | A          | M          | 43                 | 17                              | Sports                             | IC                        | Yes (Once)                                       |
| 33         | T5         | A          | F          | 45                 | 29                              | Fall                               | IC                        | Naive                                            |
| 34         | T5         | A          | M          | 48                 | 1                               | MVA                                | IC                        | Naive                                            |

NLI, neurologic level of injury; AIS, American Spinal Injury Association Impairment Scale; C, cervical; M, males; MVA, motor vehicle accidents; IC, intermittent catheterization; F, females; T, thoracic.

\*Individuals relying on Foley catheters before study transferred to IC after onabotulinumtoxinA injections.
